# Supplementary material for: LiSEQ – whole-genome sequencing of a cross-sectional survey of Listeria monocytogenes in ready-to-eat foods and human clinical cases in Europe
Source: PubMed Central journal article supplement (PMC6421348; doi:10.1099/mgen.0.000257), 2019-02-18
Supplement: mgen-5-257-s001.pdf [file mgen-5-257-s001.pdf]

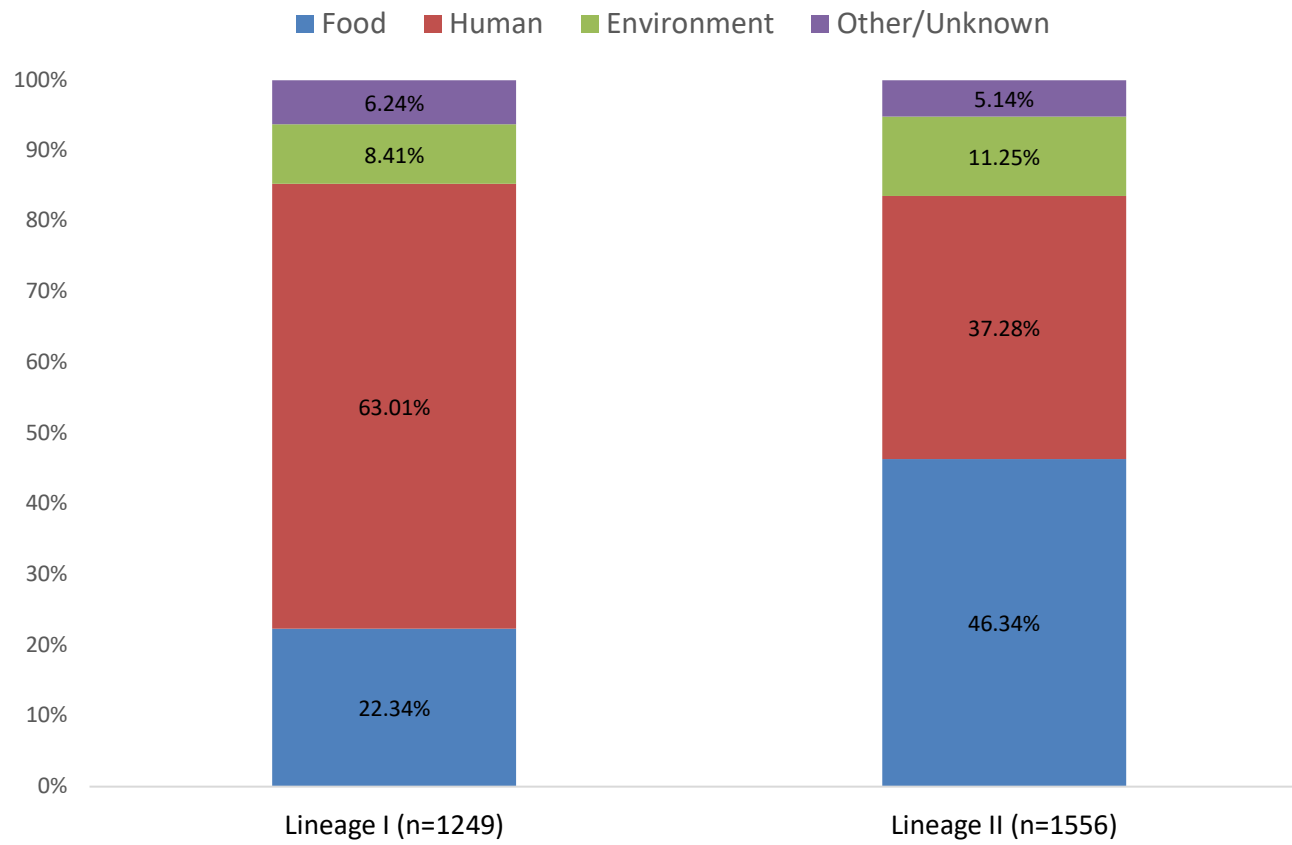

Supplementary Figure 1. Source of the isolates per lineage in the combined LiSEQ / Moura *et al.*, (2016) datasets

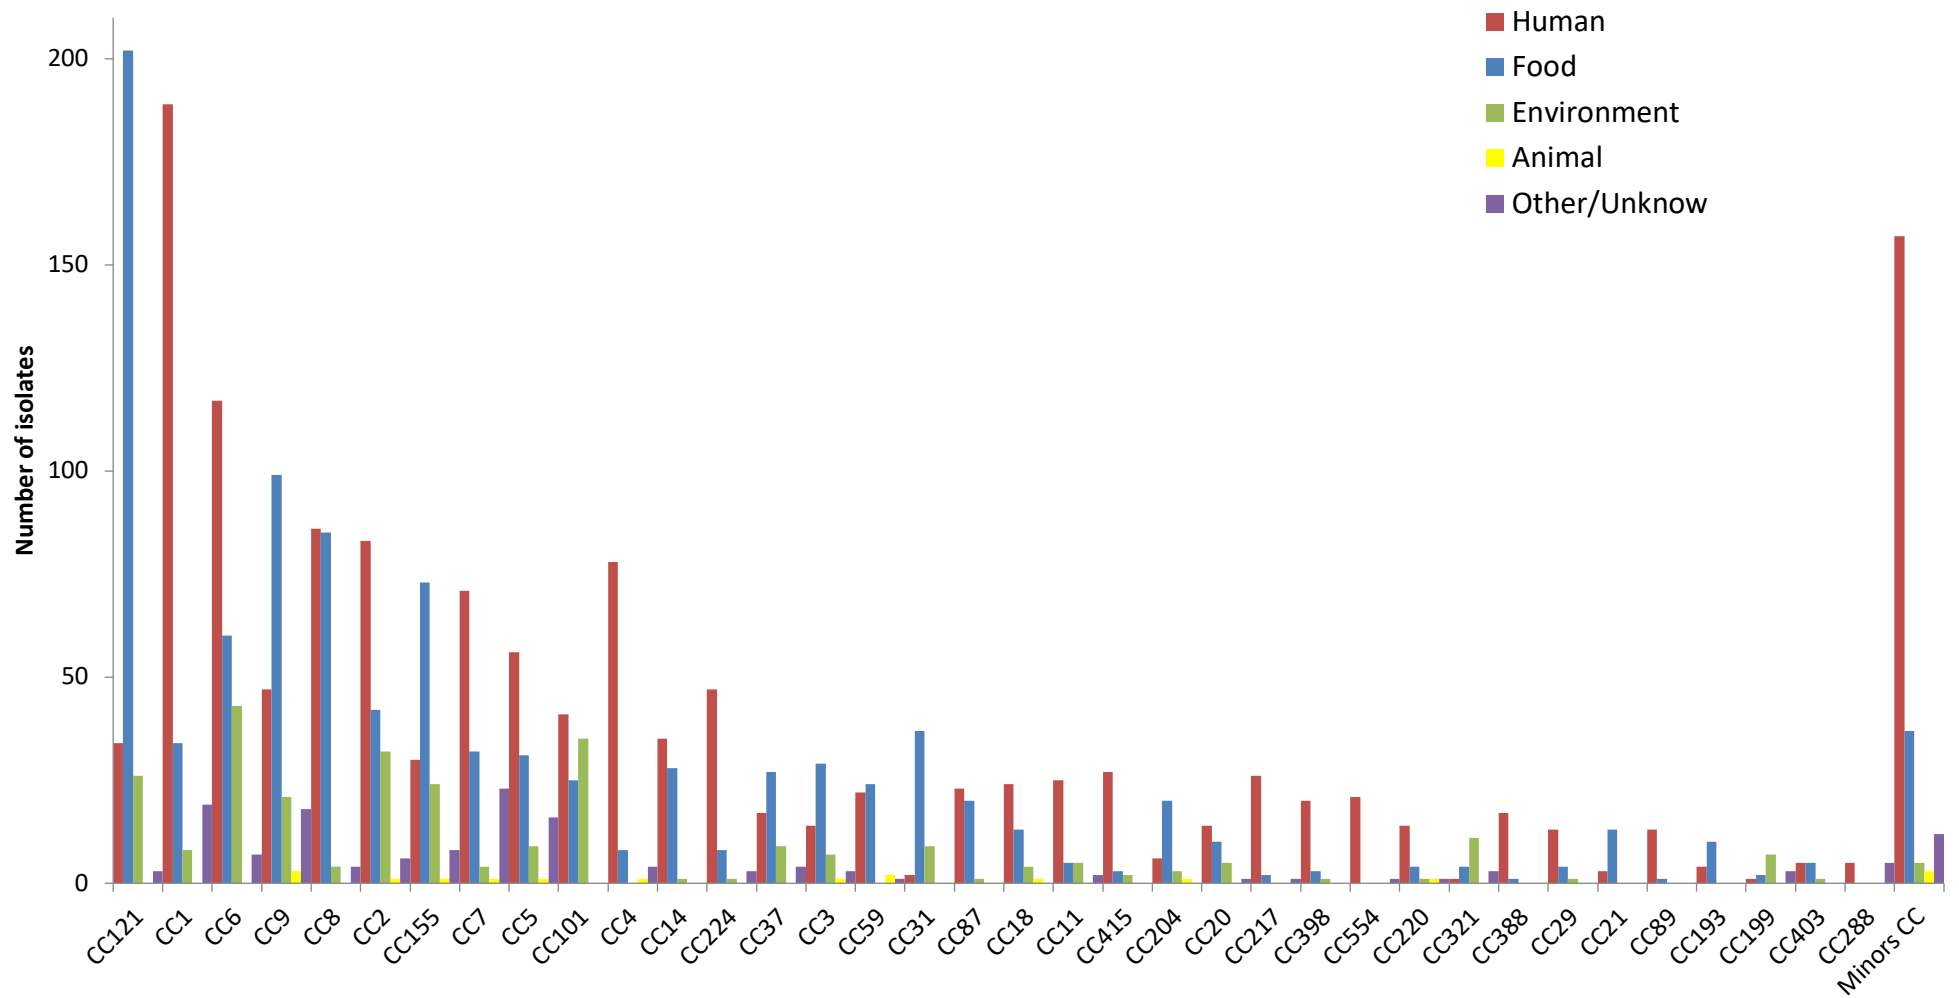

Supplementary Figure 2. Source of the isolates per clonal complex in the combined LiSEQ / Moura *et al* (2016) datasets
